# Supplementary material for: Single-fly genome assemblies fill major phylogenomic gaps across the Drosophilidae Tree of Life
Source: PubMed Central journal article supplement (PMC11257246; doi:10.1371/journal.pbio.3002697), 2024-07-18

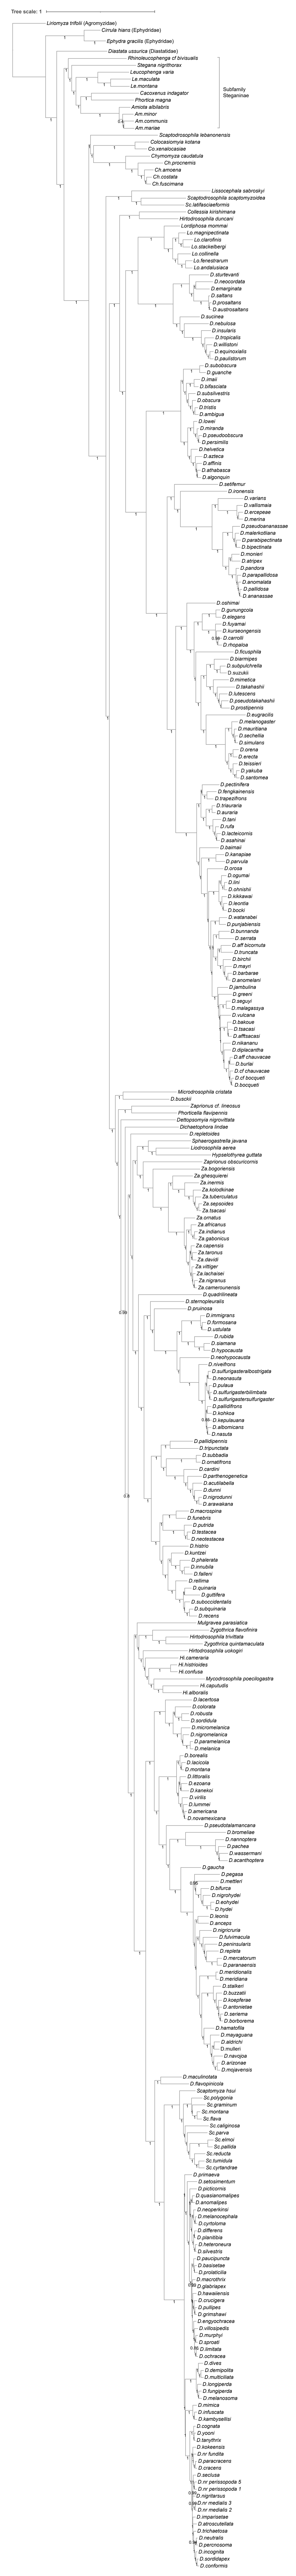

Supplement: pbio.3002697.s009.pdf [file pbio.3002697.s009.pdf]
